1 Short title: Control of isometric gigantism in tomato

2

3 Authors for contact: Agustin Zsögön [agustin.zsogon@ufv.br](mailto:agustin.zsogon@ufv.br)

4 Lázaro Peres [lazaro.peres@usp.br](mailto:lazaro.peres@usp.br)

5

6 **Article title: The *ORGAN SIZE (ORG)* locus contributes to isometric gigantism in**  
7 **domesticated tomato**

8

9 Mateus Henrique Vicente, Kyle MacLeod, Cassia Regina Fernandes Figueiredo,  
10 Antonio Vargas de Oliveira Figueira, Fady Mohareb, Zoltán Kevei, Andrew J.  
11 Thompson, Agustin Zsögön\*, Lázaro Eustáquio Pereira Peres\*.

12

13 Laboratory of Plant Developmental Genetics. Departamento de Ciências Biológicas,  
14 Escola Superior de Agricultura "Luiz de Queiroz", Universidade de São Paulo, CP 09,  
15 13418-900, Piracicaba, SP, Brazil (M.H.R., C.R.F.F., L.E.P.P.); Cranfield Soil and  
16 AgriFood Institute, Cranfield University, Cranfield, MK43 0AL, UK (K.M., F.M., Z.K.,  
17 A.J.T.); Laboratory of Plant Breeding, Centro de Energia Nuclear na Agricultura  
18 (CENA), USP, Av. Centenário, 303, CEP 13400-970, Piracicaba, SP, Brazil (A.V.O.F.);  
19 Departamento de Biologia Vegetal, Universidade Federal de Viçosa, CEP 36570-900,  
20 Viçosa, MG, Brazil (A.Z.).

21

22 The author responsible for distribution of materials integral to the findings presented in  
23 this article in accordance with the policy described in the Instruction for Authors  
24 ([www.plantphysiol.org](http://www.plantphysiol.org)) is: Lázaro E. P. Peres ([lazaro.peres@usp.br](mailto:lazaro.peres@usp.br))

25

26 One sentence summary: A locus that controls isometric size increase in vegetative and  
27 reproductive organs of tomato through changes in cell division

28

29 M.H.V performed the experiments using A.V.O.F. methods and analysed the data;  
30 C.R.F.F. provided technical assistance to M.H.V.; K.M. performed experiments using  
31 F.M. methods and analysed the data with assistance from Z.K.; A.Z. and A.J.T.  
32 analysed the data and wrote the article with contributions of all the authors; L.E.P.P

33 conceived, designed and supervised the research, and agrees to serve as corresponding  
34 author.

35 \*For correspondence: [agustin.zsogon@ufv.br](mailto:agustin.zsogon@ufv.br); [lazaro.peres@usp.br](mailto:lazaro.peres@usp.br)

36

### 37 **Abstract**

38 Gigantism is a key component of the domestication syndrome, a suite of traits that  
39 differentiates crops from their wild relatives. Allometric gigantism is strongly marked in  
40 horticultural crops, causing disproportionate increases in the size of edible parts such as  
41 stems, leaves or fruits. Tomato (*Solanum lycopersicum*) has attracted attention as a  
42 model for fruit gigantism, and many genes have been described controlling this trait.  
43 However, the genetic basis of a corresponding increase in size of vegetative organs  
44 contributing to isometric gigantism, has remained relatively unexplored. Here, we  
45 identified a 0.4 Mbp region on chromosome 7 in introgression lines (ILs) from the wild  
46 species *Solanum pennellii* in two different tomato genetic backgrounds (cv. M82 and  
47 cv. Micro-Tom) that controls vegetative and reproductive organ size in tomato. The  
48 locus, named *ORGAN SIZE (ORG)*, was fine-mapped using genotype-by-sequencing. A  
49 survey of literature revealed that *ORG* overlaps with previously mapped QTLs  
50 controlling tomato fruit weight during domestication. Alleles from the wild species led  
51 to reduced cell number in different organs, which was partially compensated by greater  
52 cell expansion in leaves but not in fruits. The result was a proportional reduction in leaf,  
53 flower and fruit size in the ILs harbouring the wild alleles. These findings suggest that  
54 selection for large fruit during domestication also tends to select for increases in leaf  
55 size by influencing cell division. Since leaf size is relevant for both source-sink balance  
56 and crop adaptation to different environments, the discovery of *ORG* could allow fine-  
57 tuning of these parameters.

58

### 59 **Introduction**

60

61 The domestication syndrome is the suite of phenotypic changes that occurred  
62 through artificial selection to transform wild species into crops (Evans 1996). Some of  
63 the most commonly found traits in crops are increased apical dominance, determinate  
64 growth and loss of natural seed dispersal (Meyer et al. 2012; Denham et al. 2020). An

65 increase in the size of certain organs, or gigantism, is also widespread, particularly in  
66 horticultural crops (Schwanitz 1957). Gigantism can be isometric, *i.e.* a proportional  
67 increase in all body parts, but most generally occurs through allometric alterations in the  
68 relative size of certain plant structures (Niklas 2004). A prime example is the species  
69 *Brassica oleracea*, where multiple cultivated strains were produced through artificial  
70 selection on the differential growth of edible organs such as stems (kohlrabi), buds  
71 (cabbage, Brussels sprouts), leaves (kale) and flowers (broccoli, cauliflower) (Prakash  
72 et al. 2011). Although increased organ size can be explained by alterations in cell  
73 division and expansion (Krizek 2009), it also requires developmental alterations to  
74 transform larger organs into stronger photosynthetic sources or sinks (Gifford et al  
75 1984). Given that photosynthesis as a biochemical process has not been improved by  
76 crop domestication or breeding (Orr et al. 2017; Batista-Silva et al. 2020), most of the  
77 genetic gains in productivity have occurred indirectly through changes in plant  
78 development (Greenland et al. 1997; Zsögön and Peres 2018).

79 In tomato (*Solanum lycopersicum* L.), gigantism is evidenced in the  
80 phenomenal increase in fruit size when compared to its wild progenitor *S.*  
81 *pimpinellifolium* (Tanksley 2004). The genetic basis of fruit size control has attracted  
82 considerable attention (reviewed in Azzi *et al.*, 2015). Increased fruit size in tomato  
83 involves mutations in multiple loci, some of which have been characterized at the  
84 molecular level, for instance *fruit weight 2.2 (fw2.2)*, *fw3.2*, *fw11.3*, *fasciated (fas)*,  
85 *locule number (lc)* and *EXCESSIVE NUMBER OF FLORAL ORGANS (ENO)*. All of  
86 them are involved in fundamental processes of plant developmental such as cell  
87 division, expansion and differentiation. The *FW2.2* gene is a negative regulator of cell  
88 division responsible for up to 30% of the increase in fruit size when comparing lines  
89 harbouring small- and big-fruit alleles (Frary et al. 2000). *FW3.2* and *FW11.3* were  
90 identified as a P450 enzyme of the CYP78A subfamily (*SIKLUH*) and a *Cell Size*  
91 *Regulator (CSR)*, controlling cell division and expansion, respectively (Chakrabarti et  
92 al. 2013; Mu et al. 2017). Unlike *fw2.2*, *fw3.2* and *fw11.3*, which mostly affect fruit size,  
93 *fas* and *lc* also control fruit shape. The big-fruit *fas* and *lc* alleles increase the number of  
94 carpels, altering cell differentiation through the CLAVATA3-WUSCHEL module  
95 (Schoof et al. 2000). The increase in the number of carpels often results in larger and  
96 wider fruits with many locules and pronounced ribbing (Lippman and Tanksley 2001;

97 van der Knaap and Tanksley 2003). The *lc* mutant phenotype is caused by two single-  
98 nucleotide polymorphisms (SNPs) downstream of the coding region of the *WUSCHEL*  
99 (*WUS*) gene (Muños et al., 2011). The *fas* mutation is a partial loss of expression caused  
100 by a chromosome inversion with a break point in the vicinity of the *CLAVATA3 (CLV3)*  
101 gene (Xu et al 2015), a negative regulator of *WUS* (Schoof et al. 2000). Lastly, *ENO* is  
102 an AP2/ERF transcription factor that interacts synergistically with *lc* and *fas*, causing a  
103 substantial increase of the *WUS* expression domain, which results in enlarged floral  
104 meristems (Fernández-Lozano et al., 2015; Yuste-Lisbona et al., 2020). Thus, the *ENO*  
105 domestication allele (a promoter deletion that knocks down its expression) also affects  
106 stem cell fate, giving rise to multilocular fruits that derive from the larger floral  
107 meristem.

108         Compared with the genetic regulation of fruit growth, relatively little is known  
109 about the control of vegetative organ size. In many crops, including tomato (Supp Fig.  
110 S1) but also peppers (Jarret et al., 2019), sunflower (Warburton et al., 2017), soybeans  
111 (Kofsky et al., 2018) and common beans (Herron et al., 2020), domestication entailed  
112 the selection of plants with bigger shoots and leaves. In tomato, the proportional  
113 increase in the size of vegetative parts is likely to be a component of isometric  
114 gigantism during domestication. Herein, we hypothesized that if vegetative gigantism is  
115 under genetic control, the wild species' alleles leading to reduced organ size could be  
116 found through wide crosses between cultivated tomato and its wild relative species. We  
117 selected *S. pennellii* as a wild parental, due to its annotated genome sequence (Bolger et  
118 al. 2014) and its rich repertoire of genomic tools, such as fully sequenced introgression  
119 lines (Alseikh et al. 2013; Chitwood et al. 2014). We crossed it to the cultivated tomato  
120 cv. Micro-Tom (MT) and after successive backcrosses and phenotypic selection, we  
121 isolated an introgression line with reduced vegetative and reproductive organs compared  
122 to the recurrent parental MT. We mapped this introgression to chromosome 7 and  
123 named the locus *ORGAN SIZE (ORG)*. We show that *ORG* leads to reduced organ size  
124 through changes in cell division, and that it segregates as a monogenic, semi-dominant  
125 Mendelian locus. Our fine mapping results show that the *ORG* candidate genes overlap  
126 a previously described domestication sweep (Lin et al. 2014). We speculate on the  
127 impact of this locus in the tomato domestication syndrome and discuss its potential  
128 exploitation for crop breeding.

129

## 130 **Results**

131

### 132 *Natural genetic variation for leaf size in tomato*

133         Compared to domesticated tomato cultivars, most wild relatives of the tomato  
134 have small leaves (Supplemental Figure S1). Thus, we decided to look for a genetic  
135 determinant of leaf size in the wild species. We crossed *S. pennellii* to the cultivated  
136 tomato cv. Micro-Tom (MT). Upon self-fertilization of the F<sub>1</sub> population, we selected  
137 F<sub>2</sub> plants with small leaves, from which we collected pollen to backcross (BC) to MT.  
138 After six rounds of backcrossing to the recurrent parental (MT), self-fertilization  
139 (BC<sub>6</sub>F<sub>2</sub>), phenotypic screening, and further self-fertilization (BC<sub>6</sub>F<sub>n</sub>), we produced an  
140 introgression line (IL) with reduced leaf size in the MT background, which we called  
141 *ORGAN SIZE (ORG)* (Figure 1). *ORG* plants show a very conspicuous phenotype for  
142 leaf size: the difference in leaf size between MT and *ORG* was consistent across all  
143 leaves and developmental stages (Figure 1). Monogenic segregation of *ORG* was  
144 verified on a segregating population of MT and *ORG*. We determined leaf size in F<sub>1</sub>  
145 hybrids between MT and *ORG*, and the intermediate phenotype suggested that *ORG*  
146 behaves as a semi-dominant gene (Supplemental Figure S2).

147

### 148 *The smaller leaf size in ORG is caused by reduced cell division*

149         Change in organ size is due to either altered cell proliferation or expansion, or a  
150 combination of both (Krizek 2009). We analysed *ORG* leaves and found enlarged  
151 epidermal and mesophyll cells compared to MT (Supplemental Figure S3). This  
152 suggests that the smaller leaves of *ORG* are caused by reduced cell proliferation as  
153 evidenced by cell number and density of *ORG* compared to MT (Supplemental Figure  
154 S3). The greater palisade parenchyma cell size promoted an increase in leaf thickness in  
155 *ORG*. We next performed a time course analysis of reproductive growth starting eight  
156 days before anthesis and until 16 days after anthesis and verified a decrease in the size  
157 of styles, ovaries and fruits in *ORG* (Figure 2). As in the case of leaves, the reduction  
158 was caused by lower cell numbers, which we verified as a reduced number of cell layers  
159 in the pericarp. The ovary cells of *ORG* were also smaller than MT cells at anthesis and  
160 post-anthesis. Other floral organs, namely, petals and sepals, were also reduced in *ORG*

161 flowers compared to MT (Supplemental Figure S4). The reduced size of floral organs  
162 may have strong consequences on fruit development, given their impact on ovary size  
163 (Supplemental Figure S4e-h).

164

165 ***Fruit weight and yield are reduced in ORG***

166 The size and shape of the ovary before anthesis is strongly correlated with the  
167 final size and shape of the fruit (Grandillo et al., 1999; Azzi et al., 2015). Thus, we next  
168 analysed the potential impact of *ORG* on fruit development. Fruit set was reduced in  
169 heterostylic *ORG* flowers, so we hand-pollinated emasculated MT and *ORG* flowers in  
170 a reciprocal cross. Several ovaries per plant were pollinated, but after fruit set  
171 confirmation (five days after pollination), we performed selective fruit removal to allow  
172 only five fruits to set on each plant. The presence of *ORG* ovaries had a substantial  
173 impact on the final fruit size regardless of pollen origin (Figure 3). Fruit weight was 31-  
174 37% lower in *ORG* than in MT ( $P < 0.0001$ , Supplemental Table S2). *ORG* fruits have  
175 higher total soluble solids content (°Brix) compared to MT (Supplemental Figure S5).  
176 We further observed that *ORG* had a similar frequency of locule number per fruit and  
177 reduced seed number (Supplemental Figure S5). Reciprocal crosses indicated that the  
178 reduction in seed number is determined by *ORG* ovaries rather than pollen  
179 (Supplemental Figure 5c).

180 We next addressed the possibility that reduced fruit size could be the  
181 consequence of altered photosynthetic source-sink relationships due to reduced leaf  
182 area. We thus manipulated the plants to maintain the availability of sources (leaves)  
183 constant and altered the source:sink ratio by changing the number of sinks (fruits).  
184 Three treatments were performed: either three, six or nine fruits were allowed to set on  
185 each plant. To ensure that additional sinks did not interfere in the results, we also  
186 pruned all the plants to remove side shoots. The results are summarized on Figure 3c-e.  
187 *ORG* plants produced consistently smaller fruits than MT in all treatments (Figure 3).  
188 The increase in fruit number, from three to six, promoted a reduction in fruit weight  
189 only in MT plants, suggesting that leaf area was a limiting factor to the final fruit weight  
190 in MT, since the leaf area was similar in both experimental conditions (Figure 3). On  
191 the other hand, when the number of fruits was increased from six to nine, there was a  
192 reduction in the final fruit weight for both genotypes. These results suggest that the

193 smaller leaf size of *ORG* could also account for its reduced fruit size, but only under full  
194 fruit load. Therefore, the primary cause of the reduced fruit size in *ORG* is likely a  
195 direct effect of this organ development since the pre-anthesis (Fig. 2c). In addition, the  
196 presence of the *ORG* introgression reduced the yield in all treatments.

197

198 ***Expression patterns are altered in genes related to cell division and expansion in***  
199 ***ORG***

200 The results described so far suggest that the transcriptional activity of genes  
201 involved in the control of cell division and expansion could be altered in *ORG*. To  
202 assess this, we extracted mRNA from ovaries/fruits at -8, -4, 0, 4 and 8 days pre/post  
203 anthesis, and fruit pericarps at 12 and 16 days to analyse the transcriptional profile of a  
204 set of genes related to the control of cell division: *CYCLIN B2;1* (Solyc02g082820),  
205 *FW2.2* (Solyc02g090730), *FW3.2/SIKLUH* (Solyc03g114940) and *EXPANSIN*  
206 *PRECURSOR 5* (Solyc02g088100).

207 In ovary/fruit tissues, we verified that the mRNA levels of the cell-division  
208 genes *CYCB2;1* and *FW3.2* showed greatest expression in both genotypes at 4 days pre-  
209 anthesis (Figure 4). *CYCB2;1* was higher in MT than *ORG* especially in pre-anthesis  
210 and anthesis stages (at -4, -8, and 0 days), while *FW3.2* was higher in anthesis and post-  
211 anthesis stages (at 0, 4 and 12 days). On the other hand, *FW2.2*, another cell-division  
212 gene, but a negative regulator, was highly expressed at 4 and 8 days post-anthesis in  
213 both genotypes. Quantitative variation in *FW2.2* expression was observed pre- and post-  
214 anthesis between genotypes (at -4 and 8 days, respectively), whereas *ORG* ovaries  
215 showed significant increased levels of this transcript compared than MT (Figure 4).  
216 After 4 days post-anthesis, the expression of the cell-expansion gene *EXPA5*, a member  
217 of the  $\alpha$ -expansin gene family, increased in in both genotypes (Figure 4). However,  
218 ovaries of *ORG* plants displayed a significant decrease in the expression of this gene at  
219 anthesis compared to MT. Similar behavior was observed 16 DPA.

220

221 ***The ORG locus is located on chromosome 7***

222 We next conducted a genotyping by sequencing (GBS) analysis to determine the  
223 size and location of the *S. pennellii* introgression in *ORG*. The results show a discrete  
224 region in the terminal end of the long arm of chromosome 7 encompassing ~11 Mb

225 (Figure 5). No further segments of *S. pennellii* genome were found on other  
226 chromosomes. Based on the SL2.50 tomato genome annotation, the introgression region  
227 contains 1169 genes. A closer look at the introgressed region revealed a small double  
228 recombination, from position 64,826,717 to 65,444,176, encompassing 78 tomato genes  
229 which score as *S. lycopersicum* (Figure 5b).

230

### 231 ***Fine-mapping of ORG using introgression lines***

232 To reduce the list of candidate genes for *ORG*, we next analysed two other  
233 introgression lines (ILs) of *S. pennellii* in the MT background previously generated in  
234 our laboratory: *Brilliant corolla* (*Bco*) and *Regeneration 7H* (*Rg7H*), both of which  
235 partially overlap either end of the *ORG* introgression (Figure 6). We used the span of  
236 the introgressions in *Bco* and *Rg7H* and the extent of their overlap with *ORG*  
237 (Supplemental Figure 6 for *Bco* and Pinto *et al.*, 2017 for *Rg7H*) to narrow down the  
238 candidate region for *ORG*. Given that neither of these ILs show the reduced organ  
239 phenotype of *ORG*, the resulting candidate region is located between positions  
240 65,444,176 and 66,373,175 (Figure 6a).

241 We took advantage of the existing collection of ILs from *S. pennellii* in tomato  
242 cv. M82 as a tool to further refine the above chromosome location (Zamir and Eshed  
243 1994; 1995). The introgressions were precisely delimited by sequencing by Chitwood *et al.*  
244 (2014), who also characterized terminal and lateral leaflet size in the ILs. Their  
245 results revealed the existence of a QTL for reduced leaflet size on both IL7-2 and IL7-3  
246 (Figure 7a-b). We also cultivated ILs harbouring *S. pennellii* genomic segments on  
247 chromosome 7 (IL7-1; IL7-2, IL7-3; IL7-4 and IL7-5) and determined their leaf and  
248 ovary size. We found a reduction in the ovaries of both IL7-2 and IL7-3, compared to  
249 M82, but under our growth conditions only IL7-2 showed consistently smaller leaves  
250 than the parental line (Supplemental Figure S7). We found a discrepancy between the  
251 Chitwood *et al.* dataset and ours for leaf size on IL7-1, but the consistently smaller  
252 pistils in IL7-2 and IL7-3 helped us delimit the right border of the candidate region to  
253 65,865,655, narrowing the interval to 421,479 bp (Figure 7c).

254

### 255 ***Genomic analysis of ORG and identification of candidate genes***



256           The resequenced dataset of tomato and wild relative accessions (Aflitos et al.,  
257 2014) was used to identify the polymorphisms of *S. pennellii* when aligned with *S.*  
258 *lycopersicum* (SL2.50) in the *ORG* region. We found 58 CDS within the *ORG* region in  
259 the *S. pennellii* genome and 65 CDS within *S. lycopersicum*, with considerable synteny  
260 (Figure 7d). Within the *ORG* region, an alignment of the *S. pennellii* genome sequence  
261 (Spenn-ch07:76,477,056-76,940,423) with *S. lycopersicum* (SL2.50ch07:65,444,176-  
262 65,865,655) showed that the two genomes were structurally similar (Supplemental  
263 Figure S8). We therefore investigated the similarities and differences in the coding  
264 sequences (CDS) between the two genomes with BLAST (Supplemental Table S3). We  
265 found a total of 6,009 polymorphisms, 5,093 of which were single-nucleotide  
266 polymorphisms (SNPs) and 916 were insertions-deletions (InDels). Additionally, there  
267 were 304 moderate effect missense variants affecting 58 genes (Supplemental Table S4)  
268 and 18 high effect polymorphisms (*e.g.* frameshift variants, stop gained) (Supplemental  
269 Table S5). There was one *S. pennellii* CDS without a corresponding match in *S.*  
270 *lycopersicum*, *i.e.* a new gene within the *ORG* region, namely Sopen07g031050  
271 (hypothetical protein). Additionally, there were six presence-absence variants (PAVs) in  
272 *S. lycopersicum* without a corresponding match in *S. pennellii* (Supplemental Table S6),  
273 *i.e.* six genes lost in the *ORG* region, namely, a Yippee family protein  
274 (Solyc07g062900), a nucleolar GTP-binding protein 2 (Solyc07g063280), a Tir 2C  
275 resistance protein (Solyc07g063360) and three CDS annotated as ‘unknown protein’.  
276 The genes Sopen07g031090 and Sopen07g031100, both being putative Yippee family  
277 zinc-binding proteins, produced multiple significant matches with Solyc07g062880,  
278 Solyc07g062890 and Solyc07g062910. Additionally, Sopen07g031530 (beta  
279 glucosidase 46) and Sopen07g031540 (hypothetical protein) produced only partial  
280 matches with Solyc07g063370 (beta glucosidase) and Solyc07g063380 (unknown  
281 protein), respectively; indicating that the gene pairs share conserved regions but are  
282 otherwise dissimilar (Figure 7d).

## 283 **Discussion**

284           The genetic basis of fruit gigantism has been extensively explored in tomato and  
285 a number of major genes controlling that trait have been identified (Nesbitt and  
286 Tanksley 2001; Causse et al. 2004; Muñoz et al. 2011; Chakrabarti et al. 2013; Mu et al.  
287 2017). However, the genetic mechanisms behind isometric gigantism between

288 vegetative and reproductive organs are unknown. Are they driven pleiotropically by  
289 genes for fruit gigantism that operate on the meristem simultaneously controlling  
290 vegetative and reproductive development, or are they the product of indirect selection  
291 on independent loci necessitated by the altered source-sink relationships between  
292 vegetative or reproductive organs? As a starting point to address this question, we set  
293 out to discover genetic determinants for changes in the size of vegetative organs in the  
294 tomato. We thus identified *ORGAN SIZE (ORG)*, an introgression with reduced leaf size  
295 but which also showed smaller reproductive organs, namely flowers and fruits.

296         Instead of the conventional approach of QTL mapping, which sometimes is  
297 followed by fine-mapping and gene cloning, we revisited the alternative, forward  
298 genetics strategy, of wide cross followed by controlled introgression (Rick, 1969). We  
299 crossed *S. pennellii* to the tomato cv. Micro-Tom (MT) and conducted multiple rounds  
300 of crosses and backcrosses to the recurrent domesticated parental, selecting plants with  
301 smaller leaves in each generation. Our results, which identified the *ORG* locus, tie up  
302 previous, independent studies of the genetic control of leaf (Holtan and Hake, 2003;  
303 Chitwood *et al.*, 2014) and fruit (Grandillo *et al.* 1999; van der Knaap and Tanksley  
304 2003; Causse *et al.* 2004; Barrantes *et al.* 2016) size in tomato using QTL analysis.  
305 Hence, a survey of previous studies that identified putative QTLs for increased fruit  
306 weight during tomato domestication and breeding reveal a chromosomal region  
307 overlapping *ORG* (Supplemental Figure 9). However, none of these studies reported  
308 alterations in vegetative development associated to fruit weight QTLs. This indicates  
309 that controlled introgression guided by phenotypic selection is a powerful tool that,  
310 unlike QTL mapping, allows the detection of genes (or closely linked genes) that  
311 control more than one trait simultaneously. Either QTL mapping, or its more up-to-date  
312 variant, genome-wide sequencing analysis (GWAS), are useful to detect multiple genes  
313 spread out in the genome controlling one trait, but on the other hand, are prone to miss  
314 pleiotropic or tightly linked genes controlling multiple traits, because generally only one  
315 phenotype is analysed at a time (Korte and Farlow, 2013).

316         Genotyping-by-sequencing showed *ORG* to harbour 1169 genes in  
317 approximately 11 Mb of *S. pennellii* genome. This represents 1.15% of the tomato  
318 genome, which is a good fit with the theoretically expected proportion of donor genome  
319 after six rounds of back-crossing (Stam and Zeven 1981). Although the segregation data

320 indicate that *ORG* behaves as a Mendelian, semi-dominant gene, we cannot at this stage  
321 exclude the possibility that the IL harbours two or more genes controlling similar traits  
322 on chromosome 7. However, we showed that the common denominator for the reduced  
323 size of vegetative and reproductive organs in *ORG* is a reduction in the number of cells,  
324 possibly through alteration of cell division rate, as suggested by our gene expression  
325 analyses for *CYCB2;1*, *FW2.2* and *FW3.2*. This trait could be under pleiotropic control  
326 of a single gene. In fact, our analysis of the genes contained in the candidate region  
327 shows variation between *S. pennellii* and *S. lycopersicum* for genes predicted to be  
328 involved in the control of cell division, as well as regulatory genes that could control the  
329 size of organs (Supplemental Tables S4 and S5). An interval containing 19 putative  
330 domestication genes was also identified on chromosome 7 by Lin *et al.* (2014) by  
331 analyzing the genome sequence of 360 tomato accessions. All 19 genes are contained  
332 within the list of 58 candidates for the *ORG* region. This paves the way for the future  
333 identification and validation of, potentially, a single gene with a unique underlying  
334 variant (*e.g.* SNP, InDel, PAV) controlling organ size.

335         Increased organ size, or gigantism, is a recurrent domestication trait observed in  
336 many crops. Selection for increased size of edible parts led to allometric increases in  
337 reproductive organs. However, domesticated plants also tend to present gigantism in  
338 vegetative parts, *e.g.* larger leaves and thicker stems in *Phaseolus vulgaris* (Donald and  
339 Hamblin, 1983), larger leaves in eggplant (Page *et al.*, 2019) and soybean (Kofsky *et*  
340 *al.*, 2018). The tomato shows striking increases in fruit size (Tanksley 2004), but also  
341 leaf area, and stem thickness compared to its wild relatives (Milla and Matesanz, 2017).  
342 This isometric size change could lead to a better balance between photosynthetic  
343 sources and fruit sinks. When we altered the relative strength of the sinks by allowing  
344 only three, six or nine fruits to develop in either MT or *ORG* plants, we found an  
345 inverse correlation between fruit number and size in MT but not in *ORG*. In addition,  
346 the reduction in fruit size of MT has no penalty in its final yield. These results suggest  
347 two things. First, that the reduced size of *ORG* fruits is an intrinsic trait, possibly a  
348 developmental result of smaller ovaries, and not an indirect consequence of reduced leaf  
349 area (photosynthetic source). The second is that leaf area is not always directly limiting  
350 fruit (sink) size and/or yield. In agreement with this, both experimental and modelling  
351 work have shown that defoliation does not have a negative effect on crop yield,

352 implying that source strength is not limiting (provided water and nutrient availability  
353 are sufficient and that photosynthesis is not light limited) (Heuvelink *et al.*, 2005). An  
354 extreme situation is found in garden peas (*Pisum sativum*), where leaf area reduction has  
355 been a breeding goal to reduce interplant competition and increase yield (Cousin, 1997).  
356 Mutants of the ‘leafless’ and ‘semi-leafless’ type show 40% lower leaf area with up to  
357 20% higher yield and better standing ability, which in turn facilitates mechanical  
358 harvesting (Checa *et al.*, 2020). The increased popularity and growing market niche for  
359 ‘gourmet’ cherry tomatoes opens up the perspective of breeding varieties with smaller  
360 leaves to improve agronomic management (*e.g.* reduced fertilizer, water use) (Sarlikioti  
361 *et al.*, 2011).

362

### 363 **Conclusions**

364         Based on the analysis of natural genetic variation, we have described a potential  
365 genetic determinant for increased leaf size in cultivated tomato. Our results could unveil  
366 a novel link in the genetic control of isometric fruit and leaf gigantism in tomato.  
367 Further research to determine the molecular identity of the gene(s) underlying the *ORG*  
368 phenotype is underway. This knowledge would be a valuable addition in the repertoire  
369 of gene targets that can be manipulated with ideotype breeding (Donald, 1968; Zsögön  
370 *et al.* 2017) or *de novo* domestication platforms (Gasparini *et al.*, 2021).

371

### 372 **Materials and methods**

373

#### 374 *Plant material*

375 The wild relatives of tomato used in this work were *S. pennellii* (LA0716), *S. chilense*  
376 (LA1969), *S. peruvianum* (LA1537), *S. neorickii* (LA1322), *S. chmieslewskii* (LA1028),  
377 *S. habrochaites* f. *glabratum* (PI134417), *S. habrochaites* f. *hirsutum* (LA1777), *S.*  
378 *galapagense* (LA1401), *S. pimpinellifolium* (CNPH384), and *S. lycopersicum* var.  
379 *cerasiforme* (LA1320). Domesticated tomatoes of the cultivars Micro-Tom (MT)  
380 (LA3911), M82 (LA3475), Moneymaker (LA2706) and Santa Clara (Brazilian local  
381 cultivar) were also used. The *S. pennellii* chromosome 7 introgression lines (ILs)  
382 harboring alleles of *ORGAN SIZE* (*ORG*), *BRILLIANT COROLLA* (*Bco*) (Chetelat  
383 1998) and *Rg7H* (Pinto *et al.* 2017) were obtained through repeated backcrossing

384 between cultivated MT as a pollen receptor and *S. pennellii*, as described in Carvalho et  
385 al. (2011). Seeds of the tomato wild relatives were obtained from the UC Davis/C.M.  
386 Rick Tomato Genetics Resource Center, maintained by the Department of Plant  
387 Sciences, University of California, Davis, CA 95616. Seeds of MT were kindly donated  
388 by Prof. Avram Levy (Weizmann Institute of Science, Israel) in 1998 and kept as a true-  
389 to-type cultivar through self-pollination.

#### 390 *Growth conditions*

391 Plants were grown in a greenhouse at the Laboratory of Plant Developmental  
392 Genetics, ESALQ-USP, (543 m a.s.l., 22° 42' 36" S; 47° 37' 50" W), Piracicaba, SP,  
393 Brazil. Automatic irrigation took place four times a day. Growth conditions were: mean  
394 temperature of 28°C, 11.5 h/13 h (winter/summer) photoperiod, 250–350  $\mu\text{mol photons}$   
395  $\text{m}^{-2} \text{s}^{-1}$  PAR irradiance, attained by a reflecting mesh (Aluminet, Polysack Indústrias  
396 Ltda, Leme, Brazil). Seeds were germinated in 350 mL pots with a 1:1 mixture of  
397 commercial potting mix Basaplant® (Base Agro, Artur Nogueira, SP, Brazil) and  
398 expanded vermiculite supplemented with 1  $\text{g L}^{-1}$  10:10:10 NPK and 4  $\text{g L}^{-1}$  dolomite  
399 limestone ( $\text{MgCO}_3 + \text{CaCO}_3$ ). Upon the appearance of the first true leaf, seedlings were  
400 transplanted to pots containing the soil mix described above, except for NPK  
401 supplementation, which was increased to 8  $\text{g L}^{-1}$ . In addition, MT and OS plants  
402 received a supplementary fertilization of 0.5g of NPK formulation 10:10:10 after  
403 flowering. Cultivated and wild tomato plants were supplemented with 2g of NPK  
404 formulation 10:10:10 per plant.

405

#### 406 *Phenotypic characterization*

407 We scanned all leaves of the MT and *ORG* plants 40 days after germination  
408 (dag) and determined the leaf area using ImageJ software (<http://rsbweb.nih.gov/ij/>).

409 For the characterization of floral whorls, we evaluated: length of petals and  
410 sepals; corolla area; and ovary weight, height and diameter. To measure ovary length  
411 and height we used a magnifying glass (Leica S8AP0, Wetzlar, Germany), coupled to a  
412 camera (Leica DFC295 Wetzlar, Germany). To determine ovary weight we determined  
413 the weight of 1.5 mL Eppendorf microtubes with 1 mL of distilled water, before and  
414 after collection of 10 ovaries. Ovary weight was then determined as the difference  
415 between initial and final tube weight. We also evaluated the leaf area and ovary weight

416 of M82 plants and introgression lines (ILs) from chromosome 7, using the same  
417 methodology as for MT and *ORG*.

418

#### 419 *MT and ORG productivity traits*

420 We hand-pollinated MT and *ORG* plants with pollen from MT and *ORG* plants,  
421 because the *ORG* genotype displayed low fruit set. Various ovaries were pollinated, but  
422 after fruit set confirmation (five days after pollination), we performed selective fruit  
423 removal to allow only five fruits to set on each plant.

424 Productive performance of plants was assessed 90 days after germination. The  
425 following parameters were determined: mean weight per fruit; total soluble solids  
426 content in fruits (Brix); locule number and number of seeds per fruit; and weight of 10  
427 seeds. Total soluble solids content of fruits was assessed using a digital refractometer  
428 (PR-101, Atago, Tokyo, Japan).

429

#### 430 *Source-sink ratio in MT and ORG plants*

431 To determine whether leaf area of *ORG* plants is a limiting factor for fruit  
432 development (since leaves and fruits are the major sources and sinks of  
433 photoassimilates, respectively), we manipulated plants creating three categories based  
434 on different source-to-sink ratios. Thus, we kept the same amount of source tissue  
435 (leaves) in all plants of each genotype and altered the sink strength by changing fruit  
436 number (either three, six or nine per plant, to produce high, medium or low source-to-  
437 sink ratios, respectively). We removed side branches to prevent them from acting as  
438 alternative sinks. The following parameters were then determined: total fruit weight per  
439 plant (yield); average fruit weight and whole-plant leaf area.

440

#### 441 *Mapping and PCR amplification of DNA markers*

442 We designed molecular markers to discover polymorphisms between tomato and  
443 *S. pennellii* in the region comprising the IL-7-2 and part of the IL 7-4 (Chitwood et al.,  
444 2014). The sequences and types of molecular makers are shown on Supplemental Table  
445 S1. Two further genotypes harbouring genome segments of *S. pennellii* for chromosome  
446 7, *Brilliant corolla* (*Bco*) and *Regeneration 7h* (*Rg7H*), both in cv. MT, were  
447 characterized molecularly and phenotypically. Cross-referencing information from these

448 genotypes and the ILs in the M82 background we constructed a map with the putative  
449 location of the *ORG* locus.

450 Genomic DNA extraction from young leaves was performed as described by  
451 Fulton et al. (1995). PCR was performed using the following program: a denaturation  
452 step at 95°C for 2 min, 35 cycles of 30 s at 95°C, 60s at 56°C, 90 s at 72°C, and a final  
453 cycle at 72°C for 7 min. When required, restriction enzyme analysis (Supplemental  
454 Table S1) was performed following the manufacturer's recommendations (NEB,  
455 Bethesda, USA). The final PCR products were analyzed via 1.5% (m/v) agarose gel  
456 electrophoresis, stained with SYBR Gold (Invitrogen).

457

#### 458 *Histological and microscopic analyses*

459 Samples of MT and *ORG* ovaries/fruits at -8, -4, 0, 4 and 8 days, and fruit  
460 pericarps at 12 and 16 days (anthesis=0), were collected and fixed in Karnovsky  
461 solution (Karnovsky 1965), and vacuum-infiltrated for 15 min. The times referred to as  
462 -8 and -4 days correspond to 8 and 4 days before anthesis, respectively. We based these  
463 on the length of the closed flower buds (Faria 2014).

464 Samples were next dehydrated in an increasing ethanol series (10–100%), and  
465 infiltrated into synthetic resin, using a HistoResin embedding kit (Leica, [www.leica-](http://www.leica-microsystems.com)  
466 [microsystems.com](http://www.leica-microsystems.com)), according to the manufacturer's instructions. The tissues were  
467 sliced using a rotary microtome (Leica RM 2045, Wetzlar, Germany), stained with  
468 toluidine blue 0.05% (Sakai 1973), and photographed in a microscope (Leica DMLB,  
469 Heidelberg, Germany), coupled to a Leica DFC310 camera (Wetzlar, Germany).  
470 Histological analysis of ovaries was performed in the central region of the outer  
471 pericarp of the fruits, and the area and number of cells were determined using ImageJ  
472 software (<http://rsbweb.nih.gov/ij/>). This histological analysis also was performed in the  
473 mature leaves of these genotypes adopting the procedures described above. The area  
474 and number of cells in the adaxial leaf epidermis of the MT and *ORG* genotypes was  
475 also evaluated using the leaf dental resin imprinting technique (Weyers and Johansen  
476 1985).

477

#### 478 *Quantitative real-time reverse transcription PCR*

479 Total RNA was extracted from ovaries/fruits at -8, -4, 0, 4 and 8 days, and fruit  
480 pericarps at 12 and 16 days (anthesis = 0), using Trizol reagent (Invitrogen), as  
481 indicated by the manufacturer, and treated with RQ1 RNase-Free DNase (Promega).  
482 Fruit pericarps were carefully collected from the central region of the outer pericarp of  
483 the fruits, at 12 and 16 days. After DNase treatment, a single-strand cDNA was  
484 synthesized from total RNA (1µg) by reverse-transcription, using RevertAid RT  
485 Reverse Transcription Kit (Thermo Fisher Scientific).

486 Gene expression analyses were performed on a Rotor-Gene Q real-time PCR  
487 cycler (Qiagen), using Kapa Sybr Fast qPCR Master Mix (Kapa Biosystems) and  
488 specific primers for *CYCB2;1* (Solyc02g082820), *FW2.2* (Solyc02g090730), *FW3.2*  
489 (Solyc03g114940) and *EXP5* (Solyc02g088100) genes. The reactions were amplified  
490 for 2 min at 95 °C, followed by 40 cycles of 95 °C for 15 s and 60 °C for 30 s. The  
491 threshold cycle ( $C_T$ ) was determined. Melting curve analysis was performed with each  
492 primer set to confirm the presence of only a single peak before the gene expression  
493 analyses. Two technical replicates were analyzed for each of three or four biological  
494 samples. The relative transcript accumulation was normalized to an *ACTIN*  
495 (Solyc04g011500) gene. The fold changes for each gene were calculated using the  
496 equation  $2^{-\Delta\Delta CT}$  (Livak and Schmittgen 2001). Primer sequences used to qRT-PCR are  
497 shown in Supplemental Table S1.

498

#### 499 *In silico analysis of probable ORG region*

500 The genomes of *S. lycopersicum* cv. Heinz 1706, SL2.50  
501 (<https://solgenomics.net/>) and *S. pennellii* LA716 (Bolger et al., 2014b) were aligned  
502 and plotted with Mummer v4.0.0 (Marcais et al., 2018). Variants of *S. pennellii* LA716  
503 versus SL2.50 within the *OS* region were obtained through the Wageningen  
504 resequencing project (Aflitos et al., 2014). The coding sequences of the genes within the  
505 region were obtained from Solanaceae Genomics Network (<https://solgenomics.net/>)  
506 and similarities between Heinz 1706 and LA716 were tested with BLAST v2.10.0  
507 (Camacho et al., 2009). The Circos plot was created with Circos v0.69.9 (Krzywinski et  
508 al., 2009) on Windows 10. The synteny plot was created with the genoPlotR package  
509 (Guy et al., 2011) within R (Team, 2017).



510 *Genotyping by sequencing (GBS)*

511 DNA was extracted from young leaf samples (~10 mm length) that were freeze-  
512 dried (CoolSafe™ 55-9; Scanvac, Lyngø, Denmark) overnight. Leaf samples were  
513 powdered in a Star-Beater (VWR, Lutterworth, UK) at 30 Hz for 30s in 2 mL  
514 microcentrifuge tubes containing two 5 mm acid-rinsed soda-glass balls. DNA was  
515 extracted from ~50 mg samples with an E.Z.N.A® Plant DNA Kit (VWR, Lutterworth,  
516 UK). DNA fragment size was assessed on a 1% agarose gel in Tris/Borate/EDTA to  
517 confirm that all samples had the majority of DNA fragments >10 kilobases.

518 The GBS library was prepared using the restriction enzyme *MspI* and sequenced  
519 on an Illumina NextSeq 500 V2 by LGC Genomics (Berlin, Germany). The 150 base-  
520 pair paired-end reads were aligned to the *Solanum lycopersicum* Heinz 1706 reference  
521 genome (SL2.50) with BWA v0.7.15 (Li and Durbin, 2009). The SAM files were  
522 processed with Samtools Fixmate v1.3.1 (Li et al., 2009). InDels were realigned with  
523 GATK's IndelRealigner v3.8-0 (McKenna et al., 2010; Depristo et al., 2011) before  
524 variant calling with Samtools Mpileup v1.3.1 and Bcftools Call v1.3 (Li, 2011).

525 The raw VCF files of the GBS sample, a 40× resequenced Micro-Tom  
526 (Cranfield University, unpublished data) and the resequencing of *S. pennellii* LA716  
527 (Aflitos et al., 2014), were combined into an index using Tersect (Kurowski and  
528 Mohareb, 2020). Tersect was used to determine which variants were shared between the  
529 *ORG* IL and *S. pennellii* LA716, excluding the variants shared with Micro-Tom. The  
530 variants output from Tersect were then filtered as follows: all variants with a quality  
531 score less than 20, a mapping quality score below 40 and a raw read depth either below  
532 10 and above 200 were removed. In addition, heterozygous variants were removed. The  
533 variant density of the filtered variants over a 10 kb window (5 kb sliding) were plotted  
534 across all 12 chromosomes with ggplot2 (Wickham, 2016) within R.

535

536 *Statistical analysis*

537 Statistical analysis was performed using SAS software (SAS Institute Inc., Cary,  
538 NC, USA). The variables data were submitted to analysis of variance (ANOVA) and the  
539 means compared by the Student's t- or Tukey's test. When the data did not meet the  
540 assumptions of ANOVA, we performed to non-parametric analysis, using Wilcoxon  
541 rank sum or Dunn's test to compare the means.

542

### 543 **Supplemental Data**

544 Supplemental Figure S1. Leaf size increases during tomato domestication and  
545 improvement.

546 Supplemental Figure S2. Heterozygous *ORG* plants (*ORG/+*) show an intermediate leaf  
547 area compared to MT and *ORG* plants.

548 Supplemental Figure S3. Smaller leaf size in *ORG* is caused by reduced cell division.

549 Supplemental Figure S4. *ORG* reduces organ size in all floral whorls

550 Supplemental Figure 5. Fruit traits are altered in *ORG* plants.

551 Supplemental Figure 6. GBS defines the span of the introgression in the *Brilliant*  
552 *corolla* (*Bco*) introgression line.

553 Supplemental Figure 7. Characterization of *S. pennellii* introgression lines (IL) in  
554 chromosome 7.

555 Supplemental Figure 8. Alignment plot of the *S. pennellii* and *S. lycopersicum* genomes  
556 within the *ORG* region.

557 Supplemental Figure 9. Colocalization of *ORG* and previously mapped fruit size QTLs.

558 Supplemental Table S1. Oligonucleotide sequences used for genotyping and  
559 quantitative PCR analyses in this work.

560 Supplemental Table S2. Fruit weight of MT and *ORG* plants.

561 Supplemental Table S3. Similarities and discrepancies between coding sequences of *S.*  
562 *pennellii* v. *S. lycopersicum* candidate genes.

563 Supplemental Table S4. Polymorphisms with a moderate effect on gene function for *S.*  
564 *pennellii* v *S. lycopersicum* within the *ORG* region.

565 Supplemental Table S5. Polymorphisms with a high effect on gene function for *S.*  
566 *pennellii* v *S. lycopersicum* within the *ORG* region.

567 Supplemental Table S6. Coding sequences of *S. lycopersicum* not producing a match on  
568 the *S. pennellii* genome assembly.

569

### 570 **Acknowledgements**

571 AZ was partly funded by a grant (RED-00053-16) from the Foundation for  
572 Research Assistance of the Minas Gerais State (FAPEMIG, Brazil). AT, FM, ZK were  
573 partially funded by BBSRC BB/S007970/1; AT and AZ were partially funded by the

574 Royal Society's Newton Mobility Grant NMG\170027 and the Global Challenges  
575 Research Fund (GCRF, UK Research and Innovation). LEPP was supported by grant  
576 306518/2018-0 from CNPq (Brazil) and 2018/050003-1 from FAPESP (Brazil). MHV  
577 gratefully acknowledges a PhD scholarship from FAPESP (16/05566-0). We thank  
578 Diego S. Reartes for valuable technical assistance.

579

## 580 **Literature cited**

581 Aflitos S, Schijlen E, De Jong H, De Ridder D, Smit S, Finkers R, Wang J, Zhang G, Li N, Mao  
582 L, et al (2014) Exploring genetic variation in the tomato (*Solanum* section  
583 *Lycopersicon*) clade by whole-genome sequencing. *Plant Journal* 80: 136–148

584 Alseekh S, Ofner I, Pleban T, Tripodi P, Di Dato F, Cammareri M, Mohammad A, Grandillo S,  
585 Fernie AR, Zamir D (2013) Resolution by recombination: Breaking up *Solanum*  
586 *pennellii* introgressions. *Trends in Plant Science* 18: 536–538

587 Azzi L, Deluche C, Gévaudant F, Frangne N, Delmas F, Hernould M, Chevalier C (2015) Fruit  
588 growth-related genes in tomato. *Journal of Experimental Botany* 66: 1075–1086

589 Batista-Silva W, da Fonseca-Pereira P, Martins AO, Zsögön A, Nunes-Nesi A, Araújo WL  
590 (2020) Engineering Improved Photosynthesis in the Era of Synthetic Biology. *Plant*  
591 *Communications* 1: 100032

592 Bolger A, Scossa F, Bolger ME, Lanz C, Maumus F, Tohge T, Quesneville H, Alseekh S,  
593 Sørensen I, Lichtenstein G, et al (2014a) The genome of the stress-tolerant wild tomato  
594 species *Solanum pennellii*. *Nature Genetics* 46: 1034–8

595 Bolger A, Scossa F, Bolger ME, Lanz C, Maumus F, Tohge T, Quesneville H, Alseekh S,  
596 Sørensen I, Lichtenstein G, et al (2014b) The genome of the stress-tolerant wild tomato  
597 species *Solanum pennellii*. *Nature Genetics* 46: 1034–1039

598 Camacho C, Coulouris G, Avagyan V, Ma N, Papadopoulos J, Bealer K, Madden TL (2009)  
599 BLAST+: Architecture and applications. *BMC Bioinformatics* 10: 1–9

600 Causse M, Duffe P, Gomez MC, Buret M, Damidaux R, Zamir D, Gur A, Chevalier C,  
601 Lemaire-Chamley M, Rothan C (2004) A genetic map of candidate genes and QTLs  
602 involved in tomato fruit size and composition. *Journal of Experimental Botany* 55:  
603 1671–1685

604 Chakrabarti M, Zhang N, Sauvage C, Muñoz S, Blanca J, Cañizares J, Diez MJ, Schneider R,  
605 Mazourek M, McClead J, et al (2013) A cytochrome P450 regulates a domestication  
606 trait in cultivated tomato. *Proceedings of the National Academy of Sciences* 110:  
607 17125–17130

608 Checa OE, Rodriguez M, Wu X, Blair MW (2020) Introgression of the *Afila* Gene into  
609 Climbing Garden Pea (*Pisum sativum* L.). *Agronomy* 10: 1537

610 Chitwood DH, Ranjan A, Kumar R, Ichihashi Y, Zumstein K, Headland LR, Ostria-Gallardo E,  
611 Aguilar-Martínez JA, Bush S, Carriedo L, et al (2014) Resolving distinct genetic

- 612 regulators of tomato leaf shape within a heteroblastic and ontogenetic context. *Plant*  
613 *Cell* 26: 3616–29
- 614 Cousin R (1997) Peas (*Pisum sativum* L.). *Field Crops Research* 53: 111–130
- 615 Denham T, Barton H, Castillo C, Crowther A, Dotte-Sarout E, Florin SA, Pritchard J, Barron A,  
616 Zhang Y, Fuller DQ (2020) The domestication syndrome in vegetatively propagated  
617 field crops. *Annals of Botany* 125: 581–597
- 618 Depristo MA, Banks E, Poplin R, Garimella K V., Maguire JR, Hartl C, Philippakis AA, Del  
619 Angel G, Rivas MA, Hanna M, et al (2011) A framework for variation discovery and  
620 genotyping using next-generation DNA sequencing data. *Nature Genetics* 43: 491–501
- 621 Donald CM (1968) The breeding of crop ideotypes. *Euphytica* 17: 385–403
- 622 Donald CM, Hamblin J (1983) The Convergent Evolution of Annual Seed Crops in Agriculture.  
623 *Advances in Agronomy* 36: 97–143
- 624 Evans LT (1996) *Crop Evolution, Adaptation and Yield*. Cambridge University Press,  
625 Cambridge, UK
- 626 Fernández-Lozano A, Yuste-Lisbona FJ, Pérez-Martín F, Pineda B, Moreno V, Lozano R,  
627 Angosto T (2015) Mutation at the tomato EXCESSIVE NUMBER OF FLORAL  
628 ORGANS (ENO) locus impairs floral meristem development, thus promoting an  
629 increased number of floral organs and fruit size. *Plant Science* 232: 41–48
- 630 Frary A, Nesbitt TC, Frary A, Grandillo S, Knaap E van der, Cong B, Liu J, Meller J, Elber R,  
631 Alpert KB, et al (2000) fw2.2: A Quantitative Trait Locus Key to the Evolution of  
632 Tomato Fruit Size. *Science* 289: 85–88
- 633 Gasparini K, Moreira J dos R, Peres LEP, Zsögön A (2021) De novo domestication of wild  
634 species to create crops with increased resilience and nutritional value. *Current Opinion*  
635 *in Plant Biology* 60: 102006
- 636 Gifford RM, Thorne JH, Hitz WD, Giaquinta RT (1984) Crop productivity and photoassimilate  
637 partitioning. *Science* 225: 801–8
- 638 Grandillo S, Ku HM, Tanksley SD (1999) Identifying the loci responsible for natural variation  
639 in fruit size and shape in tomato. *TAG Theoretical and Applied Genetics* 99: 978–987
- 640 Greenland DJ, Gregory PJ, Nye PH, Evans LT (1997) Adapting and improving crops: the  
641 endless task. *Philosophical Transactions of the Royal Society of London Series B:*  
642 *Biological Sciences* 352: 901–906
- 643 Guy L, Kultima JR, Andersson SGE, Quackenbush J (2011) GenoPlotR: comparative gene and  
644 genome visualization in R. *Bioinformatics* 27: 2334–2335
- 645 Herron SA, Rubin MJ, Ciotir C, Crews TE, Van Tassel DL, Miller AJ (2020) Comparative  
646 Analysis of Early Life Stage Traits in Annual and Perennial Phaseolus Crops and Their  
647 Wild Relatives. *Front Plant Sci.* doi: 10.3389/fpls.2020.00034
- 648 Heuvelink E, Bakker MJ, Elings A, Kaarsemaker R, Marcelis LFM (2005) Effect of leaf area on  
649 tomato yield. *Acta horticulturae*

- 650 Holtan HEE, Hake S (2003) Quantitative Trait Locus Analysis of Leaf Dissection in Tomato  
651 Using *Lycopersicon pennellii* Segmental Introgression Lines. *Genetics* 165: 1541–1550
- 652 Jarret RL, Barboza GE, Batista FR da C, Berke T, Chou Y-Y, Hulse-Kemp A, Ochoa-Alejo N,  
653 Tripodi P, Veres A, Garcia CC, et al (2019) Capsicum—An Abbreviated Compendium.  
654 *Journal of the American Society for Horticultural Science* 144: 3–22
- 655 Karnovsky MJ (1965) A formaldehyde-glutaraldehyde fixative of high osmolality for use in  
656 electron microscopy. *Journal of Cell Biology* 27: 137A-137A
- 657 van der Knaap E, Tanksley SD (2003) The making of a bell pepper-shaped tomato fruit:  
658 identification of loci controlling fruit morphology in Yellow Stuffer tomato. *Theor Appl*  
659 *Genet* 107: 139–147
- 660 Kofsky J, Zhang H, Song B-H (2018) The Untapped Genetic Reservoir: The Past, Current, and  
661 Future Applications of the Wild Soybean (*Glycine soja*). *Front Plant Sci.* doi:  
662 10.3389/fpls.2018.00949
- 663 Korte A, Farlow A (2013) The advantages and limitations of trait analysis with GWAS: a  
664 review. *Plant Methods* 9: 29
- 665 Krizek BA (2009) Making bigger plants: key regulators of final organ size. *Current Opinion in*  
666 *Plant Biology* 12: 17–22
- 667 Krzywinski M, Schein J, Birol I, Connors J, Gascoyne R, Horsman D, Jones SJ, Marra MA  
668 (2009) Circos: An information aesthetic for comparative genomics. *Genome Research*  
669 19: 1639–1645
- 670 Kurowski TJ, Mohareb F (2020) Tersect: A set theoretical utility for exploring sequence variant  
671 data. *Bioinformatics* 36: 934–935
- 672 Li H (2011) A statistical framework for SNP calling , mutation discovery , association mapping  
673 and population genetical parameter estimation from sequencing data. 27: 2987–2993
- 674 Li H, Durbin R (2009) Fast and accurate short read alignment with Burrows–Wheeler  
675 transform. *Bioinformatics* 25: 1754–1760
- 676 Li H, Handsaker B, Wysoker A, Fennell T, Ruan J, Homer N, Marth G, Abecasis G, Durbin R,  
677 Data GP, et al (2009) The Sequence Alignment/Map format and SAMtools.  
678 *Bioinformatics* 25: 2078–2079
- 679 Lin T, Zhu G, Zhang J, Xu X, Yu Q, Zheng Z, Zhang Z, Lun Y, Li S, Wang X, et al (2014)  
680 Genomic analyses provide insights into the history of tomato breeding. *Nature Genetics*  
681 46: 1220–1226
- 682 Lippman Z, Tanksley SD (2001) Dissecting the genetic pathway to extreme fruit size in tomato  
683 using a cross between the small-fruited wild species *Lycopersicon pimpinellifolium* and  
684 *L. esculentum* var. Giant Heirloom. *Genetics* 158: 413–422
- 685 Livak KJ, Schmittgen TD (2001) Analysis of relative gene expression data using real-time  
686 quantitative PCR and the 2(-Delta Delta C(T)) Method. *Methods (San Diego, Calif)* 25:  
687 402–8

- 688 Marcais G, Delcher AL, Phillippy AM, Coston R, Salzberg SL, Aleksey Z (2018) MUMmer4:  
689 A fast and versatile genome alignment system. *PLoS Comput Biol* 14(1): 14: 1–14
- 690 Mckenna A, Hanna M, Banks E, Sivachenko A, Cibulskis K, Kernytsky A, Garimella K,  
691 Altshuler D, Gabriel S, Daly M, et al (2010) The Genome Analysis Toolkit: A  
692 MapReduce framework for analyzing next-generation DNA sequencing data. *Genome*  
693 *Research* 20: 1297–1303
- 694 Meyer RS, DuVal AE, Jensen HR (2012) Patterns and processes in crop domestication: an  
695 historical review and quantitative analysis of 203 global food crops. *New Phytologist*  
696 196: 29–48
- 697 Milla R, Matesanz S (2017) Growing larger with domestication: a matter of physiology,  
698 morphology or allocation? *Plant Biology* 19: 475–483
- 699 Mu Q, Huang Z, Chakrabarti M, Illa-Berenguer E, Liu X, Wang Y, Ramos A, van der Knaap E  
700 (2017) Fruit weight is controlled by Cell Size Regulator encoding a novel protein that is  
701 expressed in maturing tomato fruits. *PLOS Genetics* 13: e1006930–e1006930
- 702 Muñoz S, Ranc N, Botton E, Bérard A, Rolland S, Duffé P, Carretero Y, Le Paslier M-C,  
703 Delalande C, Bouzayen M, et al (2011) Increase in tomato locule number is controlled  
704 by two single-nucleotide polymorphisms located near WUSCHEL. *Plant physiology*  
705 156: 2244–54
- 706 Nesbitt TC, Tanksley SD (2001) fw2.2 Directly Affects the Size of Developing Tomato Fruit,  
707 with Secondary Effects on Fruit Number and Photosynthate Distribution. *Plant*  
708 *Physiology* 127: 575–583
- 709 Niklas KJ (2004) Plant allometry: is there a grand unifying theory? *Biological reviews of the*  
710 *Cambridge Philosophical Society* 79: 871–89
- 711 Orr DJ, Pereira AM, da Fonseca Pereira P, Pereira-Lima ÍA, Zsögön A, Araújo WL (2017)  
712 Engineering photosynthesis: progress and perspectives. *F1000 Research* 6: 1891–1891
- 713 Page AML, Daunay M-C, Aubriot X, Chapman MA (2019) Domestication of Eggplants: A  
714 Phenotypic and Genomic Insight. *In* MA Chapman, ed, *The Eggplant Genome*. Springer  
715 International Publishing, Cham, pp 193–212
- 716 Pinto M de S, Abeyratne CR, Benedito VA, Peres LEP (2017) Genetic and physiological  
717 characterization of three natural allelic variations affecting the organogenic capacity in  
718 tomato (*Solanum lycopersicum* cv. Micro-Tom). *Plant Cell, Tissue and Organ Culture*  
719 (PCTOC) 129: 89–103
- 720 Prakash S, Wu X-M, Bhat SR (2011) History, Evolution, and Domestication of Brassica Crops.  
721 *Plant Breeding Reviews*. John Wiley & Sons, Ltd, pp 19–84
- 722 Rick CM (1969) Controlled Introgression of Chromosomes of *Solanum pennellii* into  
723 *Lycopersicon esculentum*: Segregation and Recombination. *Genetics* 62: 753–768
- 724 Sarlikioti V, De Visser PHB, Buck-Sorlin GH, Marcelis LFM (2011) How plant architecture  
725 affects light absorption and photosynthesis in tomato: towards an ideotype for plant  
726 architecture using a functional-structural plant model. *Annals of Botany* 108: 1065–73

- 727 Schoof H, Lenhard M, Haecker A, Mayer KF, Jürgens G, Laux T (2000) The stem cell  
728 population of Arabidopsis shoot meristems is maintained by a regulatory loop between  
729 the CLAVATA and WUSCHEL genes. *Cell* 100: 635–644
- 730 Schwanitz F (1957) Von der Wildpflanze zur Kulturform. In F Schwanitz, ed, Die Entstehung  
731 der Kulturpflanzen. Springer, Berlin, Heidelberg, pp 1–52
- 732 Stam P, Zeven AC (1981) The theoretical proportion of the donor genome in near-isogenic lines  
733 of self-fertilizers bred by backcrossing. *Euphytica* 30: 227–238
- 734 Tanksley SD (2004) The genetic, developmental, and molecular bases of fruit size and shape  
735 variation in tomato. *Plant Cell* 16: S181–S189
- 736 Team RC (2017) R: A language and environment for statistical computing.
- 737 Warburton ML, Rauf S, Marek L, Hussain M, Ogunola O, Gonzalez J de JS (2017) The Use of  
738 Crop Wild Relatives in Maize and Sunflower Breeding. *Crop Science* 57: 1227–1240
- 739 Wickham H (2016) ggplot2: Elegant Graphics for Data Analysis, 1st ed. doi: 10.1007/978-0-  
740 387-98141-3
- 741 Xu C, Liberatore KL, MacAlister CA, Huang Z, Chu Y-H, Jiang K, Brooks C, Ogawa-Ohnishi  
742 M, Xiong G, Pauly M, et al (2015) A cascade of arabinosyltransferases controls shoot  
743 meristem size in tomato. *Nature Genetics* 47: 784–792
- 744 Yuste-Lisbona FJ, Fernández-Lozano A, Pineda B, Bretones S, Ortíz-Atienza A, García-Sogo  
745 B, Müller NA, Angosto T, Capel J, Moreno V, et al (2020) ENO regulates tomato fruit  
746 size through the floral meristem development network. *PNAS* 117: 8187–8195
- 747 Zsögön A, Cermak T, Voytas D, Peres LEP (2017) Genome editing as a tool to achieve the crop  
748 ideotype and de novo domestication of wild relatives: Case study in tomato. *Plant*  
749 *Science* 256: 120–130
- 750 Zsögön A, Peres LEP (2018) Molecular control of plant shoot architecture. *Plant Cell* 30:  
751 tpc.118.tt1218-tpc.118.tt1218

752

## 753 **Figure legends**

754

755 **Figure 1. A tomato introgression line (IL) from *S. pennellii* with reduced vegetative organs**  
756 **(*ORG*) size. (a)** Crossing scheme to create an introgression line with smaller leaves in the  
757 tomato cv Micro-Tom (MT) background **(b)** Representative population of MT (left) and *ORG*  
758 (right) plants, 25 days after germination (dag). **(c)** Side and top view of MT (top) and *ORG*  
759 (bottom) plants. **(d)** Leaf series of MT (top) and *ORG* (bottom) genotypes from cotyledons (C1)  
760 to fifth leaf (L5). Scale bar=5 cm. **(e)** Leaf area of the leaf series of MT (gray bar) and *ORG*  
761 (white bar) plants, 40 dag. Data are mean  $\pm$  s.e.m. (n=14 leaves). Statistical significance was  
762 tested by Student's *t*-test (\*\*\*) $p < 0.001$ .

763

764 **Figure 2. *ORG* affects cell number and size during fruit development. (a)** Developing  
765 ovary/fruit at -12, -8, -4, 0, 4, 8, 12 and 16 days (anthesis = 0). MT (top) and *ORG* (bottom).  
766 Scale bar=5mm. **(b)** Longitudinal sections of MT (top) and *ORG* (bottom) pericarp at -12, -8, -  
767 4, 0, 4, 8, 12 and 16 days (anthesis = 0). Scale bar = 150 $\mu$ m. **(c)** Time course of the number of

768 cell layers in the longitudinal sections of MT (gray bar) and *ORG* (white bar) ovary/fruit  
769 pericarp. Insert in top of this figure represents how the counting of the cells was performed and  
770 red lines delimited cell perimeter (n=30). (d) Time course of cell area in the cell layers of MT  
771 (gray bar) and *ORG* (white bar) (n=30). Data are mean  $\pm$  s.e.m. Statistical significance was  
772 tested by Student *t*-test ( $*p < 0.05$ ,  $***p < 0.001$ , *ns* indicates non-significant differences).  
773

774 **Figure 3. Fruit growth and source-sink relationships are altered in *ORG*.** (a) Representative  
775 MT ( $\text{♀}$ , left) and *ORG* ( $\text{♀}$ , right) ripe fruits pollinated with MT ( $\text{♂}$ , left) and *ORG* ( $\text{♂}$ , right)  
776 pollen. Scale bar=1 cm. (b) Mean (red) and median (black) values of fruit weight of MT (gray  
777 box) and *ORG* (white box) ripe fruits pollinated with MT (n=10) and *ORG* (n=14) pollen. (c)  
778 Frequency of locule number per fruit in MT and *ORG* fruits (n=125). (d) Seeds per fruit of MT  
779 and *ORG* pollinated with MT (n=11) and *ORG* (n=15) pollen. Data are mean $\pm$ s.e.m. Statistical  
780 significance was tested by Student's *t*-test ( $***p < 0.001$ ). (e-g) Average values of fruits weight  
781 (e), leaf area (f) and yield (g) from MT (gray bar) and *ORG* (white bar) plants pruned to three,  
782 six and nine fruits (n=6 plants per treatment). Data are mean $\pm$ s.e.m. Different capital and  
783 lowercase letters on the symbols indicate significant differences by Tukey's test ( $p < 0.001$ )  
784 between the treatments in MT and *ORG* genotypes, respectively.  
785

786 **Figure 4. Altered patterns of gene expression in *ORG*.** Time course of transcript levels of cell  
787 division- and expansion-related genes in ovaries/fruits of MT (gray bar) and *ORG* (white bar)  
788 genotypes. Relative (to actin control) transcript levels of *CYCB2;1* (a), *FW2.2* (b), *FW3.2* (c)  
789 and *EXP5* (d) in ovaries/fruit at -8, -4, 0, 4, 8 days and fruit pericarp at 12 and 16 days (anthesis  
790 = 0). Data are mean $\pm$ s.e.m (n=3 biological replicates indicated with black dots). Statistical  
791 significance was tested by Student's *t*-test ( $*p < 0.05$ ,  $**p < 0.01$ ,  $***p < 0.001$ ).  
792

793 **Figure 5. GBS defines the span of the introgression in the *ORG* introgression line (IL).** (a)  
794 Genome-wide density of unique variants shared between *ORG* and *S. pennellii* LA716 in the  
795 genetic background of tomato cv Micro-Tom. (b) Close up view of the introgression on  
796 chromosome 7.  
797

798 **Figure 6. Mapping refines the candidate region for *ORG*.** (a) Two introgression lines (ILs) in  
799 the tomato cv Micro-Tom (MT) background that contain different segments from *S. pennellii*  
800 on chromosome 7 (*Bco* and *Rg7H*) were mapped to refine the candidate region harboring the *ORG*  
801 locus (red segment). (b) Representative leaf of MT, *ORG*, *Rg7H* and *Bco* genotypes. Scale bar =  
802 5 cm. (c-d) Leaf area (c) and ovary weight (d) of MT, *ORG*, *Rg7H* and *Bco* (n=10). Statistical  
803 significance was tested by Tukey's test ( $p < 0.05$ ). Different letters indicate significant difference  
804 between genotypes.  
805

806 **Figure 7. Analysis of the genomic region containing *ORG*.** Terminal (a) and lateral (b) leaflet  
807 area of M82 and chromosome 7 introgression lines (ILs) from *S. pennellii*. Statistical  
808 significance was tested by ANOVA followed by Tukey's HSD test. Redrawn from Chitwood et  
809 al. (2014). (c) Chromosomal position of *S. pennellii* genomes segments in tomato cv. M82  
810 background in chromosome 7. The location of the *ORG* candidate region is shown in red. (d)  
811 Synteny plot of the coding sequences (CDS) within the *ORG* region between *S. lycopersicum*  
812 and *S. pennellii* genomes. The similarity between the CDS of *S. lycopersicum* (SL2.50) and *S.*  
813 *pennellii* (Spenn) were tested with BLAST+ and variant effect prediction was obtained from the  
814 resequenced dataset (Aflitos et al. 2014). Key: Dark green, CDS that match with a high level of  
815 similarity, but *S. pennellii* alleles contain single nucleotide polymorphisms (SNPs). Light green,  
816 *S. pennellii* alleles contain insertions and deletions (InDels). Red, *S. pennellii* alleles contain  
817 variants predicted to cause loss of function. Blue, complex relationship between *S. lycopersicum*  
818 and *S. pennellii* alleles, i.e. multiple matches between different genes. Grey, partial matches



819 between *S. lycopersicum* and *S. pennellii* alleles, *i.e.* CDS with conserved regions but otherwise  
820 dissimilar. Black, genes present in *S. lycopersicum* or *S. pennellii* only.



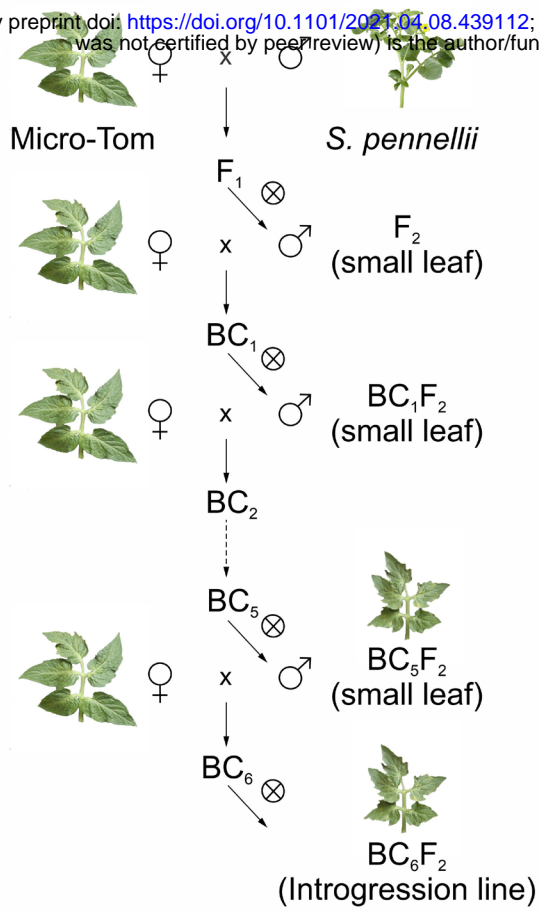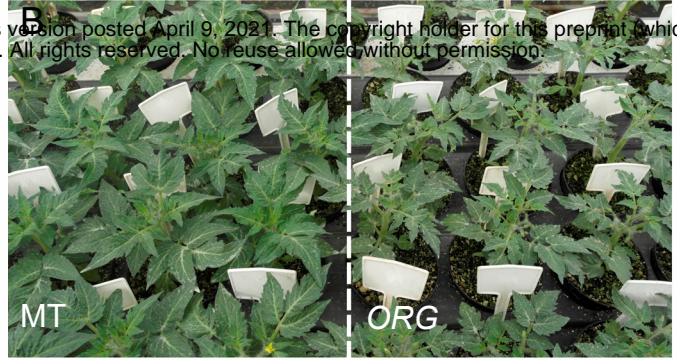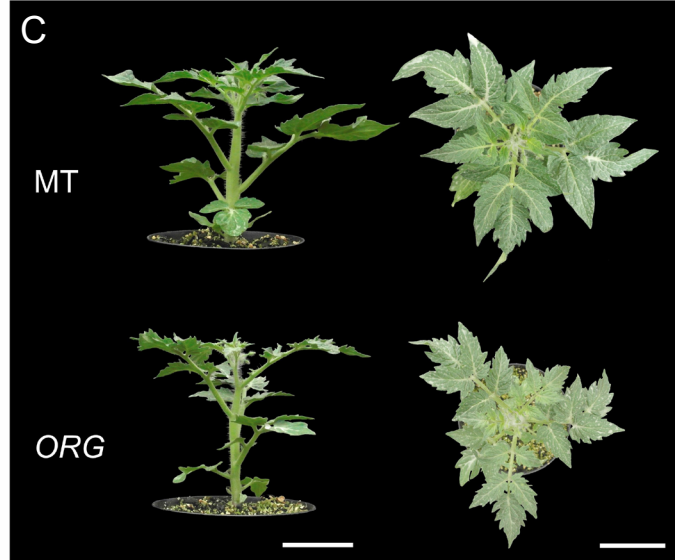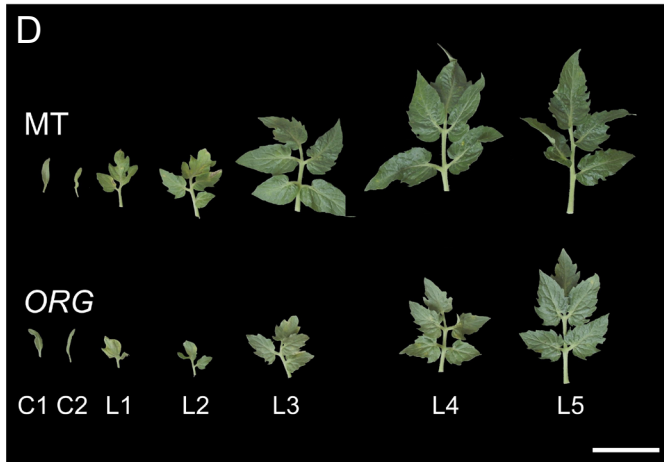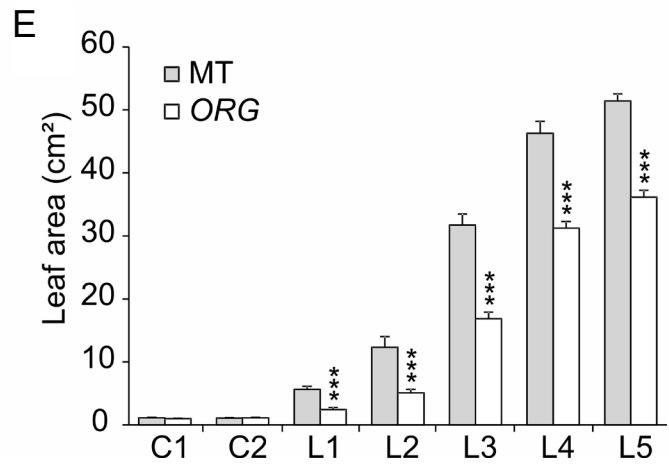

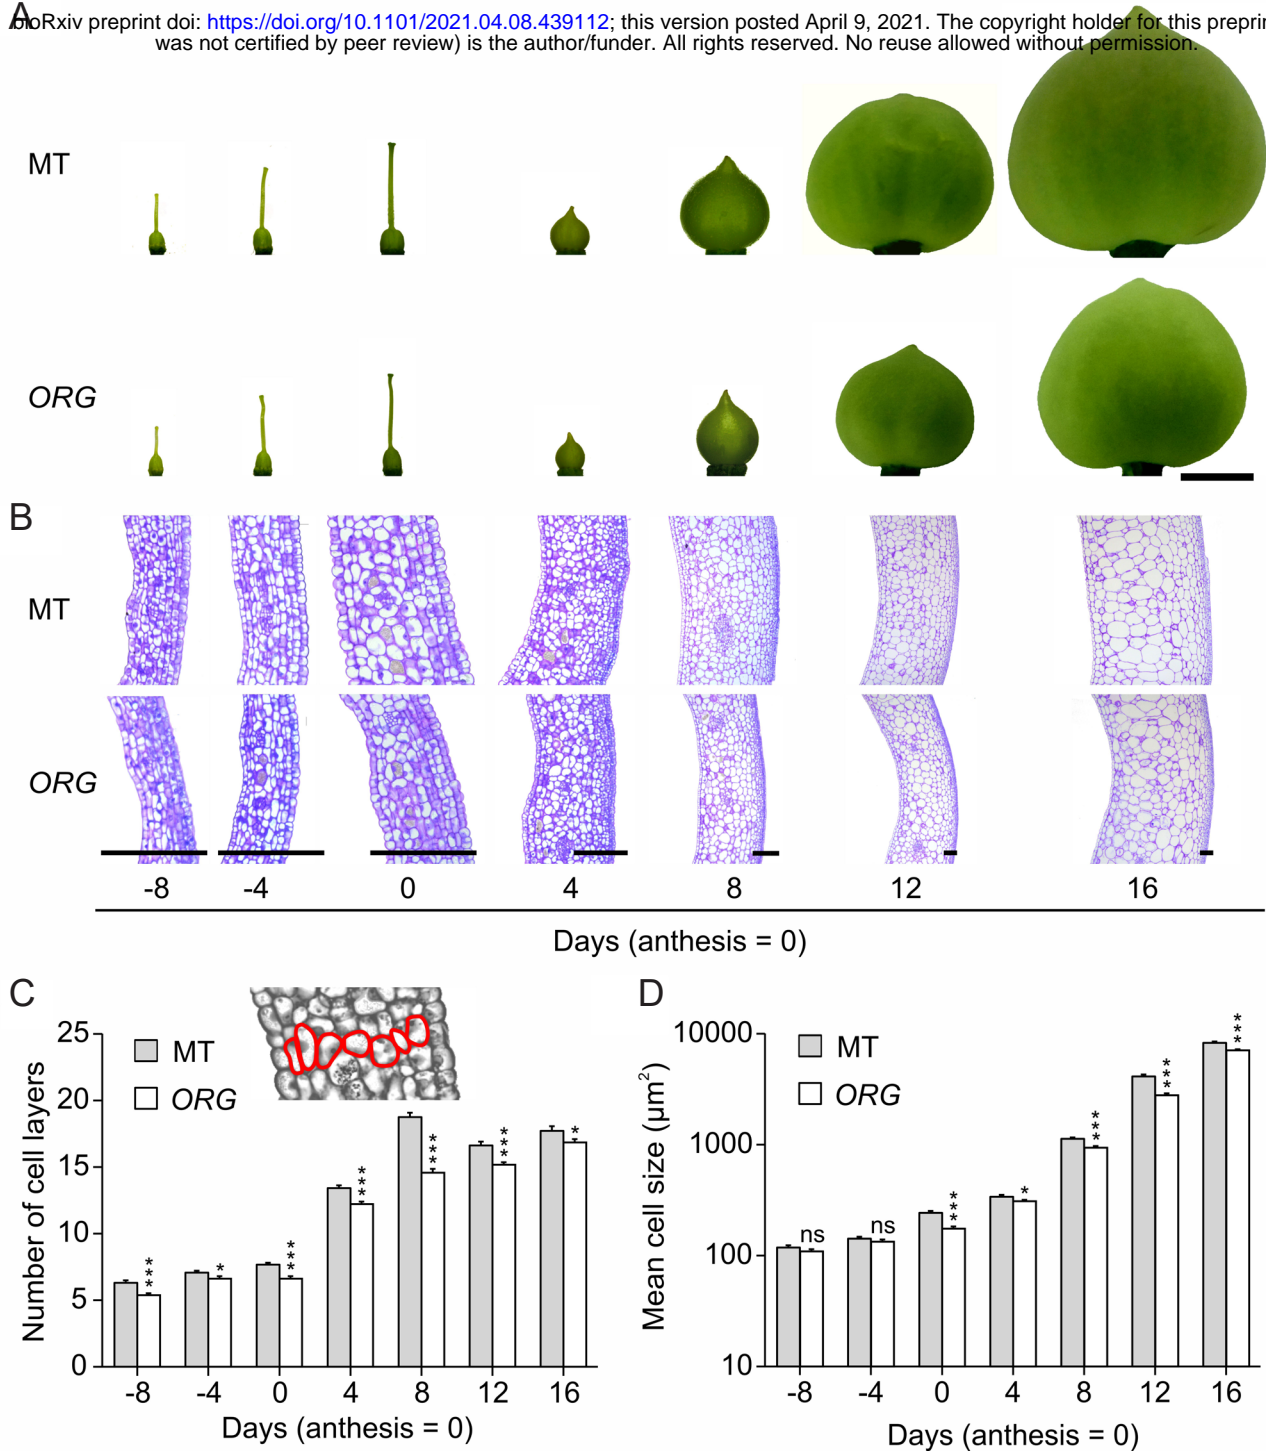

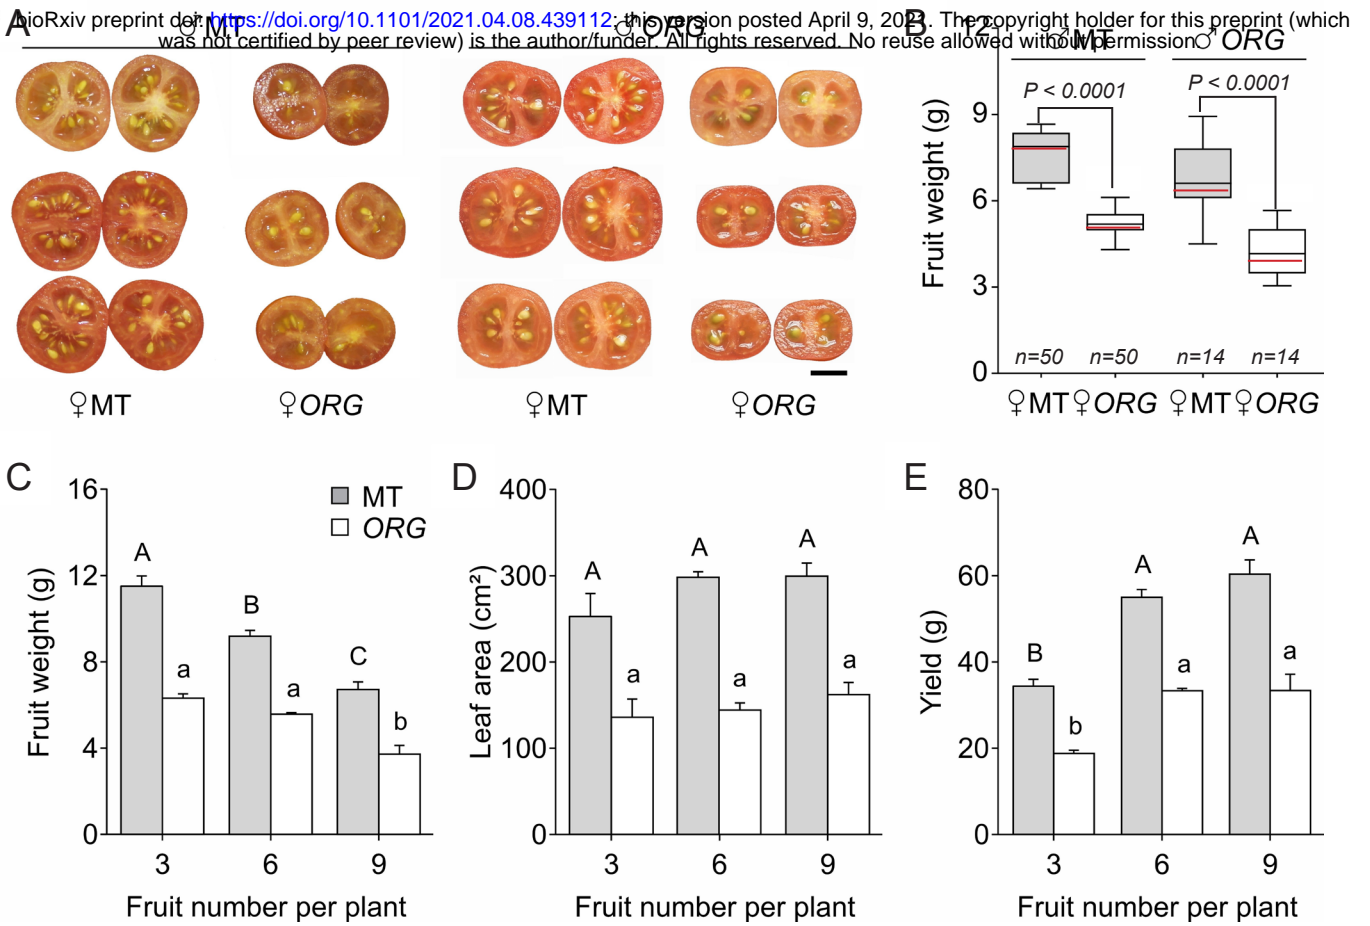

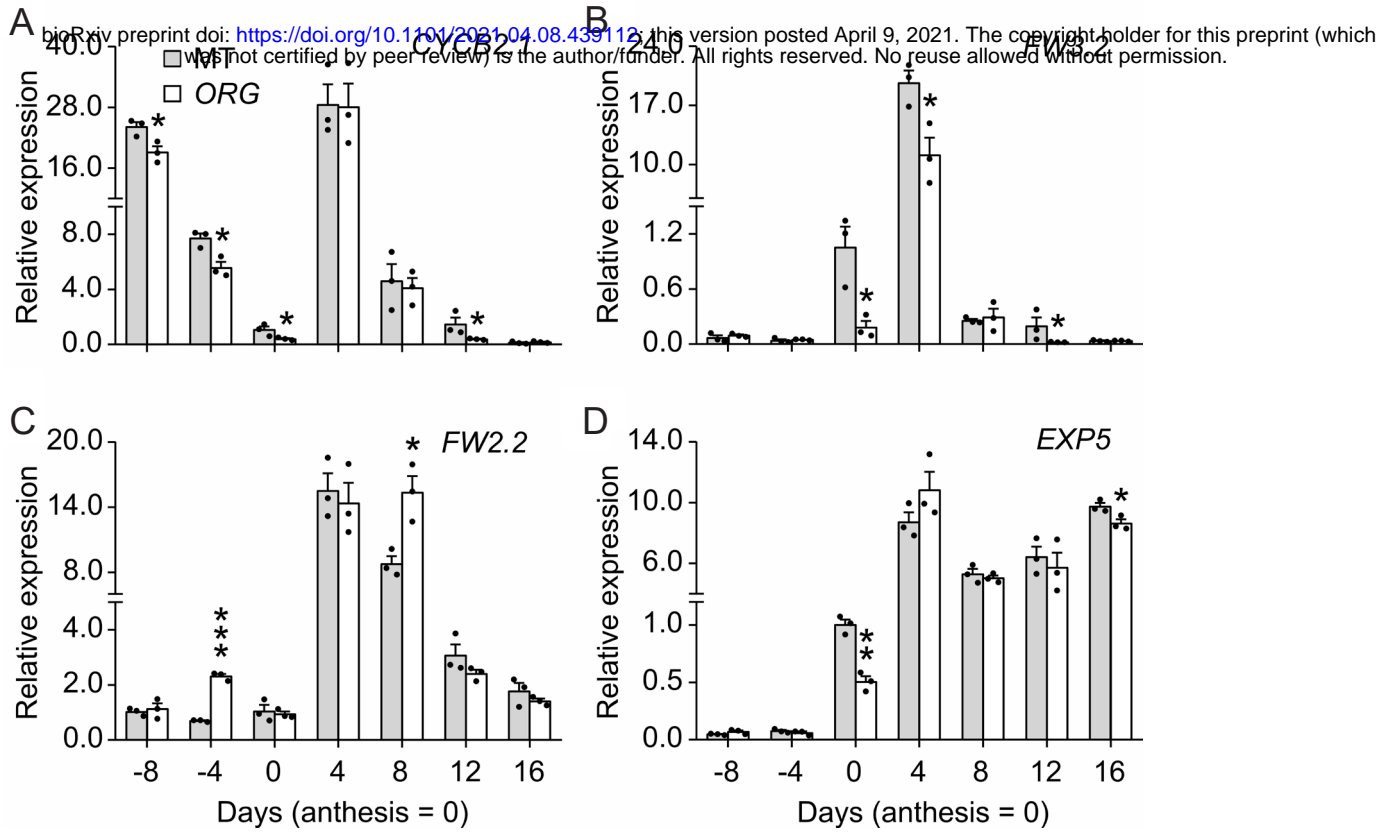

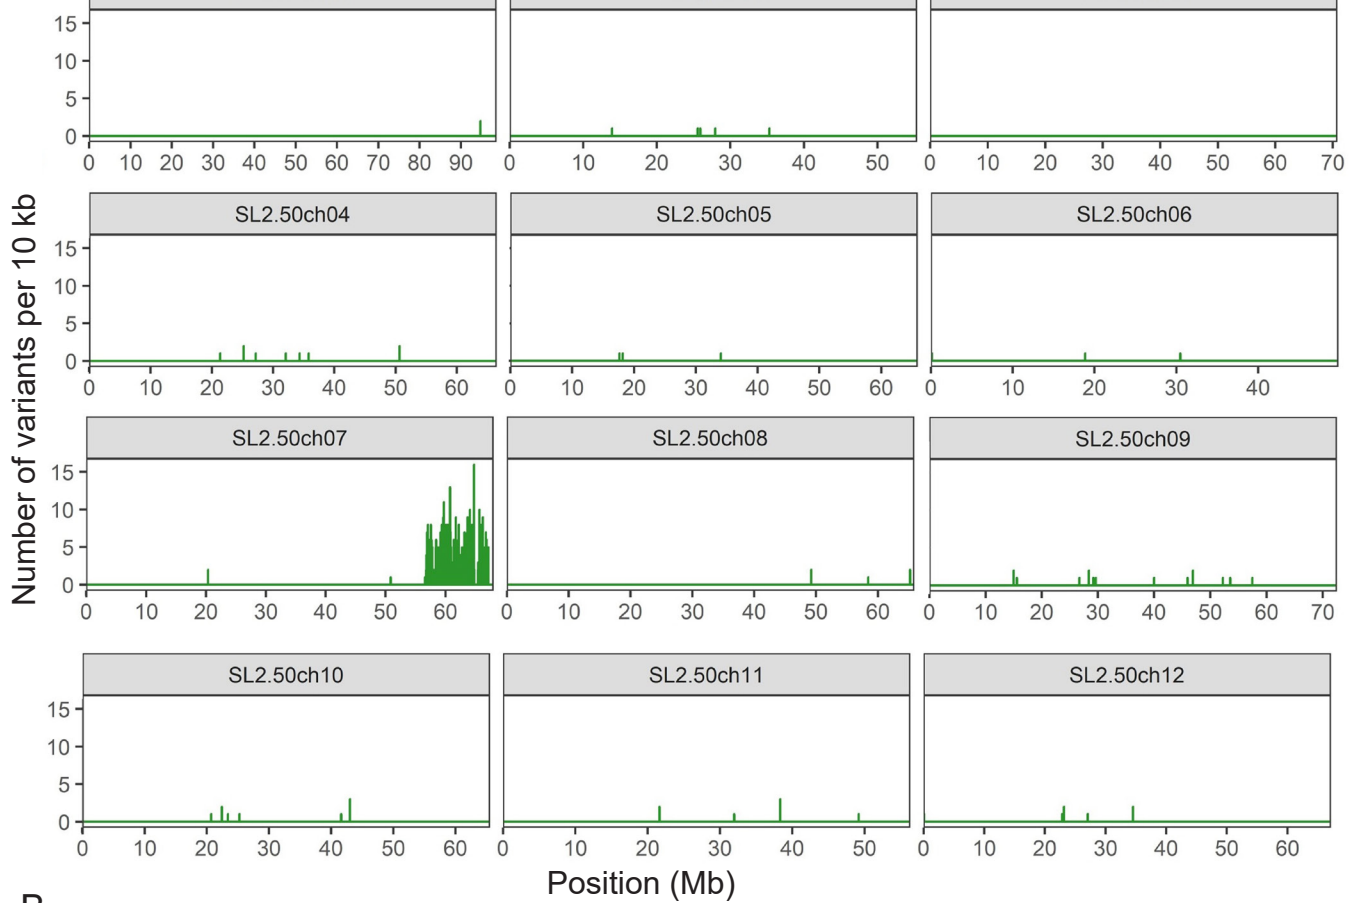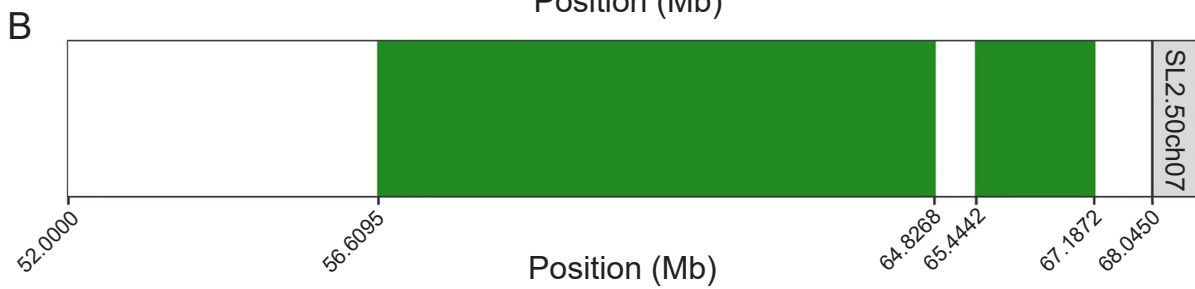

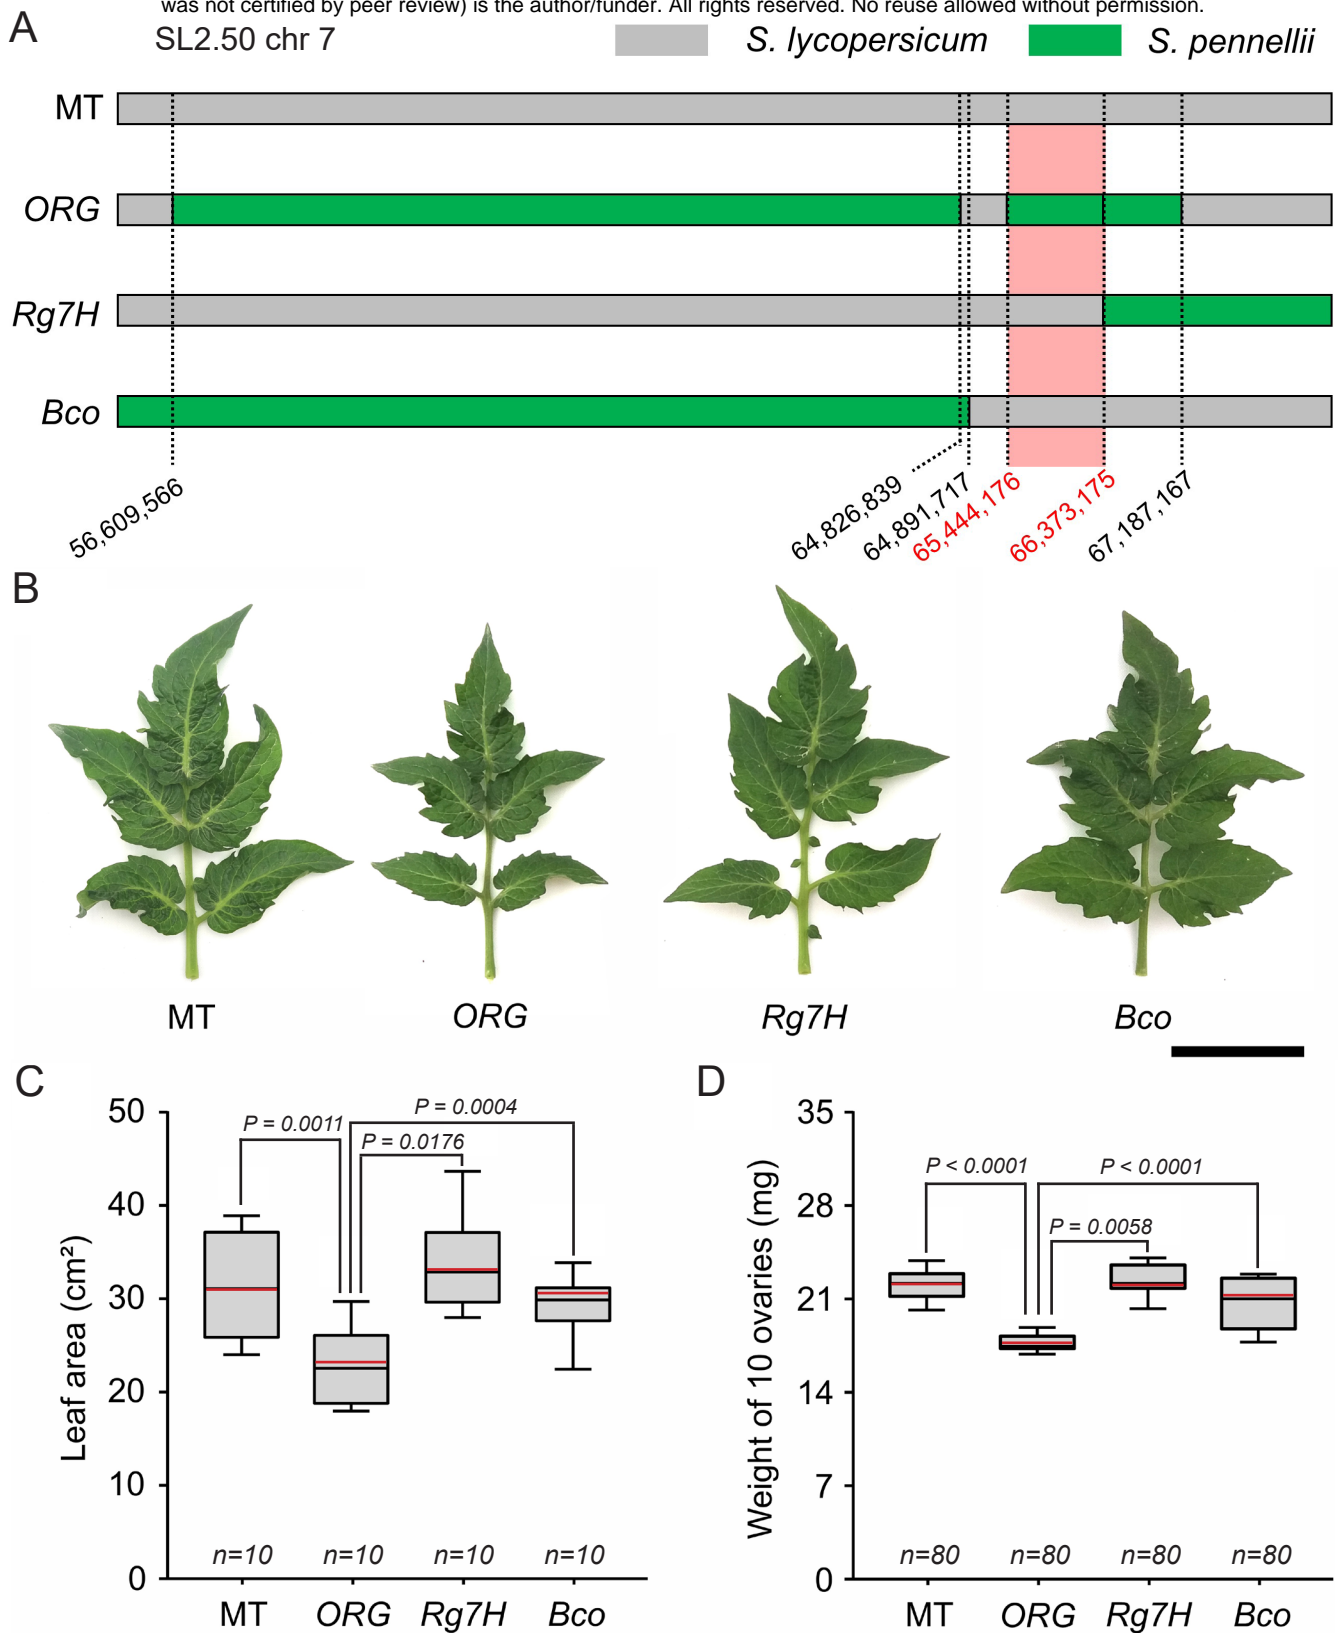



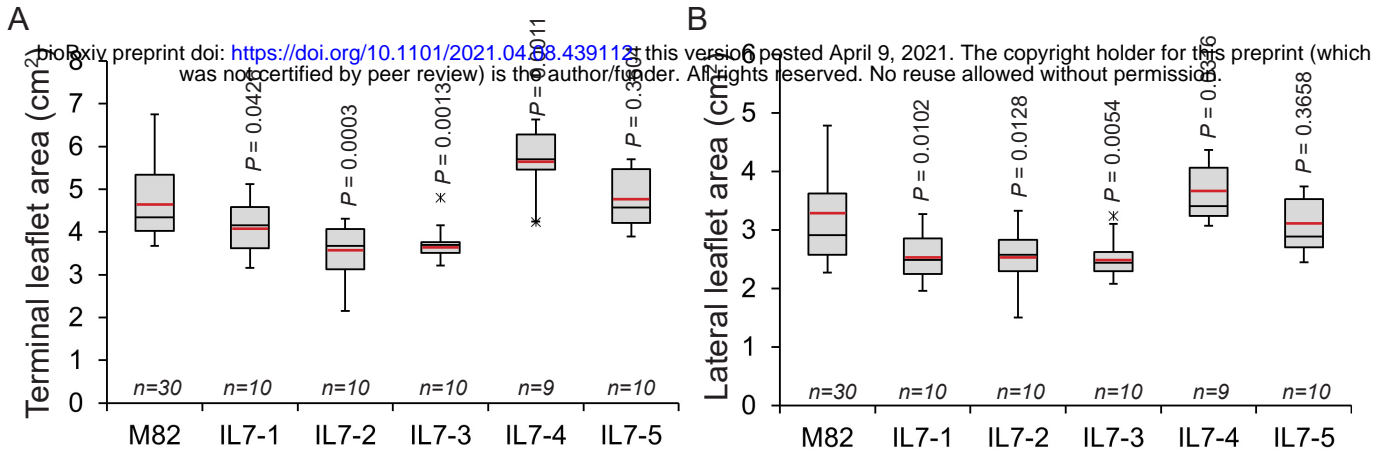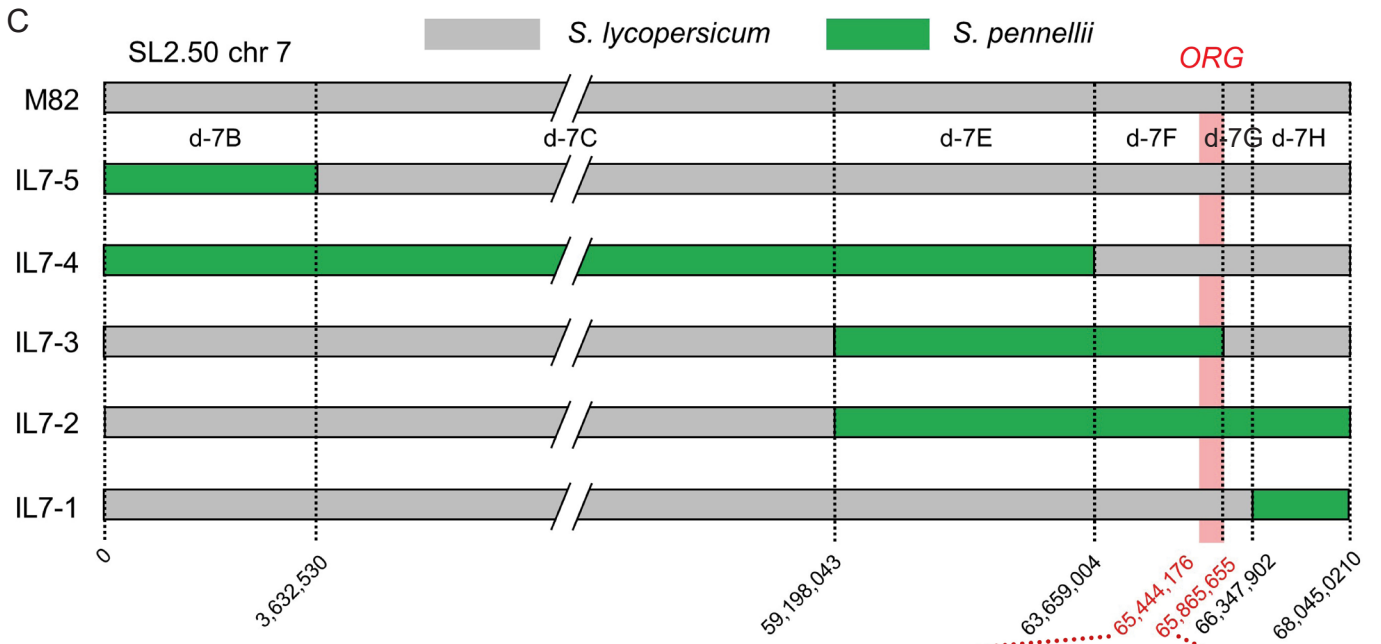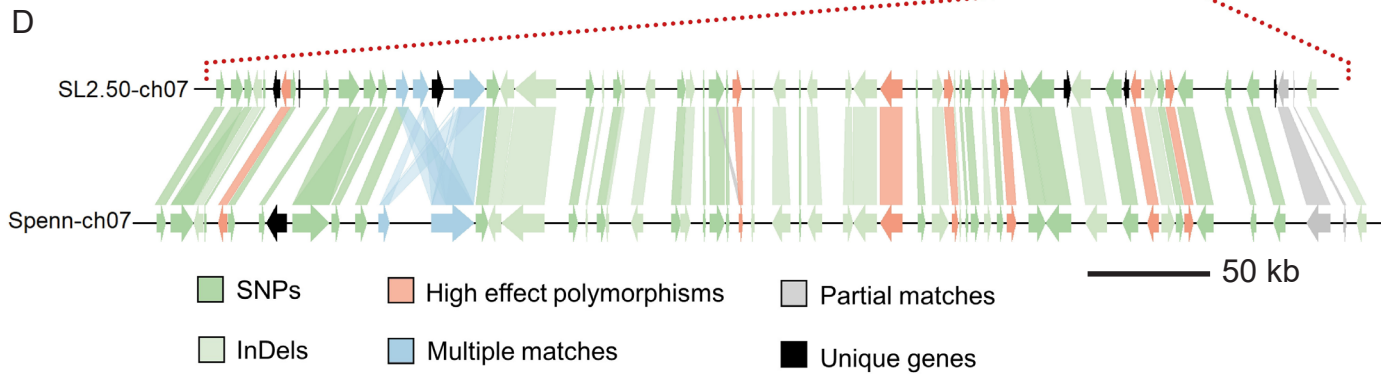

Source: https://www.biorxiv.org/content/biorxiv/early/2021/04/09/2021.04.08.439112.full.pdf
